# Supplementary material for: Racial Disparities in Cancer Presentation and Outcomes: The Contribution of Overdiagnosis
Source: PubMed Central journal article supplement — JNCI Cancer Spectr. 2020 Apr 6;4(2):pkaa001. doi: 10.1093/jncics/pkaa001 (PMC7190210; doi:10.1093/jncics/pkaa001), 2020-04-06
Supplement: pkaa001_supplementary_data.pdf [file pkaa001_supplementary_data.pdf]

## Supplementary Material

### Supplementary Box 1. SEER codes used for database queries

#### Data

Incidence – SEER 13 Regs Research Data, Nov 2018 Sub (1992-2016) <Katrina/Rita Population Adjustment>

Incidence-Based Mortality – SEER 13 Regs Research Data, Nov 2018 Sub (1992-2016) <Katrina/Rita Population Adjustment>

Survival—Cause-Specific Survival, Kaplan-Meier

#### Statistic

Rates – Age Adjusted, standard population: 2000 US Std population (19 age groups – Census P25-1130), age variable: age recode with < 1-year olds

#### Selection

Incidence Rate Selections:

- Select only: Malignant behavior, known age, first matching record for each person
- Origin Recode NHIA = Non-Spanish-Hispanic-Latino
- Race recode = W, B
- Other, Type of Reporting Source = 'Hospital inpatient/outpatient or clinic,' 'Radiation treatment or medical oncology center (2006+),' 'Laboratory only (hospital or private),' 'Physician's office / private medical practitioner (LMD)', 'Nursing/convalescent home/hospice,' 'Other hospital outpatient unit or surgery center (2006+)'

Survival Selections:

- Select only: Microscopically Confirmed, Malignant Behavior, Known Age.
- Exclude: All Death Certificate Only and Autopsy Only, Alive with No Survival Time,
- Exclusions to Match the Expected Survival Table: Age Values Not Found in Table, Invalid Year, Values Not Found for Other Variables in Table
- Multiple Primary Selection: First Primary Only (Sequence Number 0 or 1)

#### Parameters (Survival Only)

Survival Calculation: Pre-calculated Duration. Survival months (from complete dates)  
 Censor When Attained Age Exceeds Expected Table Max

#### Papillary Thyroid Cancer

Site and Morphology Site Recode (ICD-O-3/WHO 2008) = 'Thyroid'

Site and Morphology Histologic Type ICD-O-3 = 8050/3, 8260/3, 8340/3-8344/3

#### ER/PR+ Breast Cancer

Site and Morphology Site Recode (ICD-O-3/WHO 2008) = 'Breast'

Race, Sex, Year Dx, Registry, County = 'Female'

Extent of Disease – CS, ER Status Recode Breast Cancer (1990+) = 'Positive'

Extent of Disease – CS, PR Status Recode Breast Cancer (1990+) = 'Positive'

**Supplementary Table 1.** Incidence, incidence-based mortality, and survival of persons with papillary thyroid cancer, white vs. black persons.

|                                                                                 | White Persons,<br>Papillary Thyroid Cancer | Black Persons<br>Papillary Thyroid Cancer | <i>P</i> *† |
|---------------------------------------------------------------------------------|--------------------------------------------|-------------------------------------------|-------------|
| Incidence, Rate (CI)‡§                                                          | 14.3 (14.1-14.5)                           | 7.7 (7.4-8.1)                             | <.001       |
| Size                                                                            |                                            |                                           |             |
| ≤ 2 cm                                                                          | 10.0 (9.8-10.2)                            | 4.9 (4.6-5.2)                             | <.001       |
| 2.1-4.0 cm                                                                      | 2.9 (2.8-3.0)                              | 1.4 (1.2-1.6)                             | <.001       |
| >4 cm                                                                           | 1.4 (1.4-1.5)                              | 1.4 (1.3-1.6)                             | .88         |
| SEER Summary Stage, Rate (CI)‡§                                                 |                                            |                                           |             |
| Localized                                                                       | 9.0 (8.8-9.2)                              | 5.7 (5.4-6.0)                             | <.001       |
| Regional                                                                        | 4.8 (4.7-4.9)                              | 1.7 (1.5-1.9)                             | <.001       |
| Distant                                                                         | 0.33 (0.30-0.37)                           | 0.22 (0.16-0.30)                          | .008        |
| American Joint Committee on Cancer Stage (7 <sup>th</sup> Edition), Rate (CI)‡§ |                                            |                                           |             |
| Stage I/II                                                                      | 11.6 (11.4-11.9)                           | 6.2 (5.9-6.6)                             | <.001       |
| Stage III/IV                                                                    | 2.3 (2.2-2.4)                              | 1.3 (1.1-1.4)                             | <.001       |
| Incidence-Based Mortality, Rate (CI)‡                                           | 0.16 (0.15-0.17)                           | 0.12 (0.10-0.15)                          | .01         |
| 5-year Overall Survival, % (CI)                                                 | 96.0% (95.8-96.2%)                         | 94.3% (93.4%-95.0%)                       | <.001       |
| 5-year Disease-Specific Survival, % (CI)                                        | 98.5% (98.4-98.7%)                         | 98.7% (98.2-99.0%)                        | .70         |
| 20-year Overall Survival, % (CI)                                                | 81.0% (80.2-81.8%)                         | 76.1% (73.0-78.9%)                        | <.001       |
| 20-year Disease-Specific Survival, % (CI)                                       | 96.7% (96.4-97.0%)                         | 96.1% (94.5-97.3%)                        | .32         |

\*Incidence rates are compared using two-sided Chi-square test. †Survival curves are compared using log-rank test. ‡ Rates expressed are per 100,000 age-adjusted population. §Incidence data presented are from 2010-2014. ||Incidence-based mortality and survival data presented are from 1992-2014.

**Supplementary Table 2.** Incidence, incidence-based mortality, and survival of women with ER/PR+ breast cancer, white vs. black women.

|                                                                                 | White Women<br>ER/PR+ Breast Cancer ¶ | Black Women<br>ER/PR+ Breast Cancer ¶ | P*†   |
|---------------------------------------------------------------------------------|---------------------------------------|---------------------------------------|-------|
| Incidence, Rate (CI)‡§                                                          | 94.8 (94.0-95.5)                      | 70.9 (69.4-72.5)                      | <.001 |
| Size                                                                            |                                       |                                       |       |
| ≤ 2cm                                                                           | 61.2 (60.6-61.8)                      | 38.1 (37.0-39.3)                      | <.001 |
| 2.1-5cm                                                                         | 25.4 (25.0-25.8)                      | 23.4 (22.6-24.4)                      | <.001 |
| > 5cm                                                                           | 9.3 (9.1-9.5)                         | 10.1 (9.1-10.7)                       | <.001 |
| SEER Summary Stage, Rate (CI)‡§                                                 |                                       |                                       |       |
| Localized                                                                       | 65.1 (64.5-65.7)                      | 43.0 (41.8-44.3)                      | <.001 |
| Regional                                                                        | 25.6 (25.2-26.0)                      | 22.1 (21.5-23.2)                      | <.001 |
| Distant                                                                         | 4.6 (4.4-4.7)                         | 5.5 (5.1-6.0)                         | <.001 |
| American Joint Committee on Cancer Stage (7 <sup>th</sup> Edition), Rate (CI)‡§ |                                       |                                       |       |
| Stage I/II                                                                      | 81.2 (80.5-81.9)                      | 56.3 (55.0-57.7)                      | <.001 |
| Stage III/IV                                                                    | 12.3 (12.0-12.6)                      | 13.3 (12.7-14.0)                      | .005  |
| Incidence-Based Mortality, Rate (CI)‡¶                                          | 7.2 (7.2-7.3)                         | 8.1 (7.9-8.4)                         | <.001 |
| 5-year Overall Survival, % (CI)¶                                                | 86.5% (86.3-86.6%)                    | 80.0% (79.4-80.6%)                    | <.001 |
| 5-year Disease-Specific Survival, % (CI)¶                                       | 93.4% (93.3-93.5%)                    | 87.2% (86.7-87.7%)                    | <.001 |
| 20-year Overall Survival, % (CI)¶                                               | 44.4% (44.0-44.8%)                    | 37.7% (36.2-39.2%)                    | <.001 |
| 20-year Disease-Specific Survival, % (CI)¶                                      | 77.7% (77.3-78.1%)                    | 66.1% (64.7-67.5%)                    | <.001 |

\*Incidence rates are compared using two-sided Chi-square test. †Survival curves are compared using log-rank test. ‡ Rates expressed are per 100,000 age-adjusted population. §Incidence data presented are from 2010-2014. ¶Incidence-based mortality and survival data presented are from 1992-2014. ¶ ER/PR+, Estrogen Receptor/Progesterone Receptor positive.

**Supplementary Table 3.** Incidence, incidence-based mortality and survival of women less than 40 years of age with estrogen/progesterone receptor positive breast cancer, white vs. black women

|                                                                                 | White Women <40<br>ER/PR+ Breast Cancer ¶ | Black Women <40<br>ER/PR+ Breast Cancer ¶ | P*†   |
|---------------------------------------------------------------------------------|-------------------------------------------|-------------------------------------------|-------|
| Incidence, Rate (CI)‡§                                                          | 8.5 (8.2-8.9)                             | 7.7 (7.1-8.5)                             | .05   |
| Size                                                                            |                                           |                                           |       |
| ≤ 2cm                                                                           | 4.0 (3.7-4.2)                             | 2.9 (2.4-3.3)                             | <.001 |
| 2.1-5cm                                                                         | 3.3 (3.1-3.5)                             | 3.4 (3.0-3.9)                             | .62   |
| > 5cm                                                                           | 1.3 (1.2-1.5)                             | 1.5 (1.2-1.8)                             | .43   |
| SEER Summary Stage, Rate (CI)‡§                                                 |                                           |                                           |       |
| Localized                                                                       | 4.0 (3.8-4.3)                             | 3.1 (2.7-3.6)                             | <.001 |
| Regional                                                                        | 3.9 (3.6-4.1)                             | 3.6 (3.1-4.1)                             | .29   |
| Distant                                                                         | 0.69 (0.59-0.80)                          | 1.0 (0.79-1.3)                            | .01   |
| American Joint Committee on Cancer Stage (7 <sup>th</sup> Edition), Rate (CI)‡§ |                                           |                                           |       |
| Stage I/II                                                                      | 6.5 (6.2-6.8)                             | 5.1 (4.6-5.7)                             | <.001 |
| Stage III/IV                                                                    | 2.0 (1.8-2.2)                             | 2.4 (2.1-2.9)                             | .03   |
| Incidence-Based Mortality, Rate (CI)‡¶                                          | 0.34 (0.31-0.37)                          | 0.68 (0.60-0.78)                          | <.001 |
| 5-year Overall Survival, % (CI)¶                                                | 91.1% (90.4-91.7%)                        | 80.5% (78.4-82.4%)                        | <.001 |
| 5-year Disease-Specific Survival, % (CI)¶                                       | 91.6% (91.0-92.2%)                        | 82.1% (80.0-84.0%)                        | <.001 |
| 20-year Overall Survival, % (CI)¶                                               | 65.6 (63.8-67.3)                          | 53.2 (48.8-57.4)                          | <.001 |
| 20-year Disease-Specific Survival, % (CI)¶                                      | 69.5 (67.8-71.1)                          | 57.9 (53.6-61.9)                          | <.001 |

\*Incidence rates are compared using two-sided Chi-square test. †Survival curves are compared using log-rank test. ‡ Rates expressed are per 100,000 age-adjusted population. §Incidence data presented are from 2010-2014. ¶Incidence-based mortality and survival data presented are from 1992-2014. ¶ ER/PR+, Estrogen Receptor/Progesterone Receptor positive.

## Papillary Thyroid Cancer (PTC)

### Percent of diagnosed cancers

|                         |     |
|-------------------------|-----|
| White (P <sub>w</sub> ) | 90% |
| Black (P <sub>b</sub> ) | 10% |

### Incidence per 100,000 persons

|                         |      |
|-------------------------|------|
| White (I <sub>w</sub> ) | 14.2 |
| Black (I <sub>b</sub> ) | 7.7  |

**Difference in incidence attributable to overdiagnosis, (I<sub>w-b</sub>)** 6.5 [100% of difference in incidence, see manuscript text]

### 20-year disease specific survival

|       |       |
|-------|-------|
| White | 96.7% |
| Black | 96.1% |

### Equations #1 and 2: Calculation of overdiagnosis rates in white (O<sub>w</sub>) and black (O<sub>b</sub>) populations

**Equation #1:** Calculation of the race-specific contribution to the estimated overall overdiagnosis rate

$$O_{all} = (P_w \times O_w) + (P_b \times O_b)$$

**Equation #2:** Calculation of the race-specific contribution to the difference in white and black cancer rates attributable to overdiagnosis

$$I_{w-b} = (I_w \times O_w) - (I_b \times O_b)$$

**Equation #3:** Adjusting of survival rates for overdiagnosis using calculated overdiagnosis rates (O<sub>w</sub> or O<sub>b</sub>) from equations 1 and 2

$$\text{Adjusted Survival} = (\text{Survival} - \text{Overdiagnosis Rate}) / (100 - \text{Overdiagnosis Rate})$$

| Candidate overall rate of overdiagnosis (O <sub>all</sub> ) | Calculated rate of overdiagnosis, white persons (O <sub>w</sub> ) | Calculated rate of overdiagnosis, black persons (O <sub>b</sub> ) | Calculated Ratio (O <sub>w</sub> :O <sub>b</sub> ) | Calculated adjusted survival, white persons* | Calculated adjusted survival, black persons* | Difference in adjusted survival (white vs. black) |
|-------------------------------------------------------------|-------------------------------------------------------------------|-------------------------------------------------------------------|----------------------------------------------------|----------------------------------------------|----------------------------------------------|---------------------------------------------------|
| 55%                                                         | 58.5%                                                             | 23.5%                                                             | 2.5                                                | 92.0%                                        | 94.9%                                        | -2.9%                                             |
| 60%                                                         | 63.1%                                                             | 32.0%                                                             | 2.0                                                | 91.1%                                        | 94.3%                                        | -3.2%                                             |
| <b>65%</b>                                                  | <b>67.7%</b>                                                      | <b>40.5%</b>                                                      | <b>1.7</b>                                         | <b>89.8%</b>                                 | <b>93.4%</b>                                 | <b>-3.6%</b>                                      |
| 70%                                                         | 72.3%                                                             | 49.0%                                                             | 1.5                                                | 88.1%                                        | 92.4%                                        | -4.3%                                             |
| 75%                                                         | 76.9%                                                             | 57.5%                                                             | 1.3                                                | 85.7%                                        | 90.8%                                        | -5.1%                                             |

\*20-year disease-specific survival

**Supplementary Figure 1.** Modeled estimates of the rates of overdiagnosis of papillary thyroid cancer in white and black persons, based on excess incidence in white persons, and estimates of rates of overdiagnosis in the population. See Methods for further description of estimates used. The 65% overall overdiagnosis estimate is from Vaccarella et al.<sup>15</sup>

### **Estrogen / Progesterone Receptor Positive (ER/PR+) Breast Cancer**

#### Percent of diagnosed cancers

|                         |     |
|-------------------------|-----|
| White (P <sub>w</sub> ) | 89% |
| Black (P <sub>b</sub> ) | 11% |

#### Incidence per 100,000 persons

|                         |      |
|-------------------------|------|
| White (I <sub>w</sub> ) | 91.7 |
| Black (I <sub>b</sub> ) | 68.6 |

**Difference in incidence attributable to overdiagnosis, (I<sub>w</sub>-I<sub>b</sub>)** 21.9 [95% of difference in incidence, see manuscript text]

#### 20-year disease specific survival

|       |       |
|-------|-------|
| White | 77.7% |
| Black | 66.1% |

#### **Equations #1 and 2: Calculation of overdiagnosis rates in white (O<sub>w</sub>) and black (O<sub>b</sub>) populations**

**Equation #1:** Calculation of the race-specific contribution to the estimated overall overdiagnosis rate

$$O_{all} = (P_w \times O_w) + (P_b \times O_b)$$

**Equation #2:** Calculation of the race-specific contribution to the difference in white and black cancer rates attributable to overdiagnosis

$$I_{w-b} = (I_w \times O_w) - (I_b \times O_b)$$

**Equation #3:** Adjusting of survival rates for overdiagnosis using calculated overdiagnosis rates (O<sub>w</sub> or O<sub>b</sub>) from equations 1 and 2

$$\text{Adjusted Survival} = (\text{Survival} - \text{Overdiagnosis Rate}) / (100 - \text{Overdiagnosis Rate})$$

| Candidate overall rate of overdiagnosis (O <sub>all</sub> ) | Calculated rate of overdiagnosis, white persons (O <sub>w</sub> ) | Calculated rate of overdiagnosis, black persons (O <sub>b</sub> ) | Ratio (O <sub>w</sub> :O <sub>b</sub> ) | Calculated adjusted survival, white persons* | Calculated adjusted survival, black persons* | Difference in adjusted survival (white vs. black) |
|-------------------------------------------------------------|-------------------------------------------------------------------|-------------------------------------------------------------------|-----------------------------------------|----------------------------------------------|----------------------------------------------|---------------------------------------------------|
| 25%                                                         | 27.5%                                                             | 4.8%                                                              | 5.7                                     | 69.2%                                        | 64.4%                                        | 4.8%                                              |
| 30%                                                         | 32.3%                                                             | 11.3%                                                             | 2.9                                     | 67.1%                                        | 61.8%                                        | 5.3%                                              |
| 35%                                                         | 37.1%                                                             | 17.7%                                                             | 2.1                                     | 64.5%                                        | 58.5%                                        | 6.0%                                              |
| 40%                                                         | 42.0%                                                             | 24.2%                                                             | 1.7                                     | 61.6%                                        | 55.3%                                        | 6.3%                                              |

\*20-year disease-specific survival

**Supplementary Figure 2.** Modeled estimates of the rates of overdiagnosis of estrogen/progesterone receptor positive breast cancer in white and black women, based on excess incidence in white women, and estimates of rates of overdiagnosis in the population. ER/PR+, estrogen/progesterone receptor positive. See Methods for further description of estimates used. The 30% overall overdiagnosis estimate is from Bleyer and Welch.<sup>14</sup>
